# Supplementary material for: Exploring Transcriptional Regulation of Hyperaccumulation in Sedum plumbizincicola through Integrated Transcriptome Analysis and CRISPR/Cas9 Technology
Source: MDPI journal article supplement (doi:10.3390/ijms241411845), 2023-07-24
Supplement: s1 [file s1]

(a)

Wild-type SpARR11 : MMDTTTRDRTGRVVDDDTWKKMKKCYVTTCCARDARRGRKDGVDVNMMDMGKMDVNNASKRRKDVAADKCSSTSDTG : 80

sparr11-ko line1 allele 1 : MMDTTTRDRTGRVVDDDTWKKMKKCYVTTCCARDARRGRKDGVDVNMMDMGKMDVNNASKRRKDVAADKCSSTSDTG : 80

sparr11-ko line1 allele 2 : MMDTTTRDRTGRVVDDDTWKKMKKCYVTTCCARDARRGRKDGVDVNMMDMGKMDVNNASKRRKDVAADKCSSTSDTG : 80

sparr11-ko line2 allele 1 : MMDTTTRDRTGRVVDDDTWKKMKKCYVTTCCARDARRGRKDGVDVNMMDMGKMDVNNASKRRKDVAADKCSSTSDTG : 80

sparr11-ko line2 allele 2 : MMDTTTRDRTGRVVDDDTWKKMKKCYVTTCCARDARRGRKDGVDVNMMDMGKMDVNNASKRRKDVAADKCSSTSDTG : 80

Wild-type SpARR11 : STSKRARVVWTVDHKKAVKGKGGKDSMNWVTRNVASHKYRYSRKDNNGDKRVSDHDVDCCKNSDHTNDDSRNRKGDKSDA : 160

sparr11-ko line1 allele 1 : STSKRARVVWTVDHKKAVKGKGGKDSMNWVTRNVASHKYRYSRKDNNGDKRVSDHDVDCCKNSDHTNDDSRNRKGDKSDA : 160

sparr11-ko line1 allele 2 : STSKRARVVWTVDHKKAVKGKGGKDSMNWVTRNVASHKYRYSRKDNNGDKRVSDHDVDCCKNSDHTNDDSRNRKGDKSDA : 160

sparr11-ko line2 allele 1 : STSKRARVVWTVDHKKAVKGKGGKDSMNWVTRNVASHKYRYSRKDNNGDKRVSDHDVDCCKNSDHTNDDSRNRKGDKSDA : 160

sparr11-ko line2 allele 2 : STSKRARVVWTVDHKKAVKGKGGKDSMNWVTRNVASHKYRYSRKDNNGDKRVSDHDVDCCKNSDHTNDDSRNRKGDKSDA : 160

Wild-type SpARR11 : DKCSDAKVTVARHMSDHSADNNRKYWNDSNNSHHYRSTNNCSRADS AVAGKDYKRWDNHGRDADDMGSSHDARDWC : 240

sparr11-ko line1 allele 1 : DKCSDAKVTVARHMSDHSAGRG\*----- : 183

sparr11-ko line1 allele 2 : DKCSDAKVTVARHMSDHSADNNRKYWNDSNNSHHYRSTNNCSRADS AVAGKDYKRWDNHG---TRM\*----- : 227

sparr11-ko line2 allele 1 : DKCSDAKVTVARHMSDHSAGRG\*----- : 183

sparr11-ko line2 allele 2 : DKCSDAKVTVARHMSDHSADNNRKYWNDSNNSHHYRSTNNCSRADS AVAGKDYKRWDNHG---TRM\*----- : 226

Wild-type SpARR11 : GASCDTAHSSSYVVKSDSDCNDGMKCTDGKKVACRTRSSGGDR TARSGDGRGRARVTDGVARHRDRKAWARM\* : 312

sparr11-ko line1 allele 1 : ----- : -

sparr11-ko line1 allele 2 : ----- : -

sparr11-ko line2 allele 1 : ----- : -

sparr11-ko line2 allele 2 : ----- : -

(b)

Wild-type SpPHL2 : MYSAHSGDGSVYHRHSSSDCTNGDSCVMTSDKRRWTAHDRVDAVAGGDKATKTRTMGVKGTYHKSHKYRGKAGKSTNSKS : 80

spphl2-ko line1 allele 1 : MYSAHSGDGSVYHRHSSSDCTNGDSCVMTSDKRRWTAHDRVDAVAGGDKATKTRTMGVKGTYHKSHKYRGKAGKSTNSKS : 80

spphl2-ko line1 allele 2 : MYSAHSGDGSVYHRHSSSDCTNGDSCVMTSDKRRWTAHDRVDAVAGGDKATKTRTMGVKGTYHKSHKYRGKAGKSTNSKS : 80

spphl2-ko line2 allele 1 : MYSAHSGDGSVYHRHSSSDCTNGDSCVMTSDKRRWTAHDRVDAVAGGDKATKTRTMGVKGTYHKSHKYRGKAGKSTNSKS : 80

spphl2-ko line2 allele 2 : MYSAHSGDGSVYHRHSSSDCTNGDSCVMTSDKRRWTAHDRVDAVAGGDKATKTRTMGVKGTYHKSHKYRGKAGKSTNSKS : 80

Wild-type SpPHL2 : VRKRSSYVTARVMVRKHVRRRSGKYRKACKANDTVAAGAARS AKSHDSSDKMSSDTTTDSRRKTNVVRGDCSVNSCTST : 160

spphl2-ko line1 allele 1 : VRKRSSYVTARVMVRKHVRRRSGKYRKACKANDTVAAGAARS AKSHDSSDKMSSDTTTDSRRKTNVVRGDCSVNSCTST : 159

spphl2-ko line1 allele 2 : VRKRSSYVTARVMVRKHVRRRSGKYRKACKANDTVAAGAARS AKSHDSSDKMSSDTTTDSRRKTNVVRGDCSVNSCTST : 159

spphl2-ko line2 allele 1 : VRKRSSYVTARVMVRKHVRRRSGKYRKACKANDTVAAGAARS AKSHDSSDKMSSDTTTDSRRKTCDE-HCSVCTCTA- : 158

spphl2-ko line2 allele 2 : VRKRSSYVTARVMVRKHVRRRSGKYRKACKANDTVAAGAARS AKSHDSSDKMSSDTTTDSRRKTCDE-HCSVCTCTA- : 147

Wild-type SpPHL2 : ATHGASNANA AAKRRVGNSSNMVVMHSG\* : 190

spphl2-ko line1 allele 1 : ATHGASNANA AAKRRVGNSSNMVVMHSG\* : 189

spphl2-ko line1 allele 2 : ATHGASNANA AAKRRVGNSSNMVVMHSG\* : 189

spphl2-ko line2 allele 1 : --WGSK\*----- : 163

spphl2-ko line2 allele 2 : ----- : -

(c)

Wild-type SpNF-YA10 : MTTVYKYTNTGHSSATMRWTAGSHSTASKSVNTTKTDDSMVKDVKNRVANTSSGTRTVRASVTVKTSYHSDSGGSMVYTY : 80

spnf-ya10-ko line1 allele 1 : MTTVYKYTNTGHSSATMRWTAGSHSTASKSVNTTKTDDSMVKDVKNRVANTSSGTRTVRASVTVKTSYHSDSGGSMVYTY : 80

spnf-ya10-ko line1 allele 2 : MTTVYKYTNTGHSSATMRWTAGSHSTASKSVNTTKTDDSMVKDVKNRVANTSSGTRTVRASVTVKTSYHSDSGGSMVYTY : 80

spnf-ya10-ko line2 allele 1 : MTTVYKYTNTGHSSATMRWTAGSHSTASKSVNTTKTDDSMVKDVKNRVANTSSGTRTVRASVTVKTSYHSDSGGSMVYTY : 80

spnf-ya10-ko line2 allele 2 : MTTVYKYTNTGHSSATMRWTAGSHSTASKSVNTTKTDDSMVKDVKNRVANTSSGTRTVRASVTVKTSYHSDSGGSMVYTY : 80

Wild-type SpNF-YA10 : SYGDSYGVM SAYGMAGRMDSSDDGYVNAKYNRRRHRAKAVSRTKARKAYMHSRHHARRRGCGGRKTKTDGGMNSNSNM : 160

spnf-ya10-ko line1 allele 1 : SYGDSYGVM SAYGMAGRMDSSDDGYVNAKYNRRRHRAAGGTS-NHSSGVYA\*----- : 131

spnf-ya10-ko line1 allele 2 : SYGDSYGVM SAYGMAGRMDSSDDGYVNAKYNRRRHRAARRN\*----- : 122

spnf-ya10-ko line2 allele 1 : SYGDSYGVM SAYGMAGRMDSSDDGYVNAKYNRRRHRAAGGTS-NHSSGVYA\*----- : 131

spnf-ya10-ko line2 allele 2 : SYGDSYGVM SAYGMAGRMDSSDDGYVNAKYNRRRHRAAGTNGNNSRGYMASSRRGT---GCGGRKTKTDGGMNSNSNM : 157

Wild-type SpNF-YA10 : TSHSSSGSDNVTNSKTHTGNSGSATSMTYTRGNCCNANTARGVAHCCCNKA\* : 210

spnf-ya10-ko line1 allele 1 : ----- : -

spnf-ya10-ko line1 allele 2 : ----- : -

spnf-ya10-ko line2 allele 1 : ----- : -

spnf-ya10-ko line2 allele 2 : TSHSSSGSDNVTNSKTHTGNSGSATSMTYTRGNCCNANTARGVAHCCCNKA\* : 207

(d)

Wild-type SpMYB84 allele 1 : MGRACCDKANVKKGWSDTAKKSYNGTGGNNAWKRCGKSCRRWNYNRNRHGGSDNCSYSGSRWSAAGRTDNDKNYWNTRKKK : 80

Wild-type SpMYB84 allele 2 : MGRACCDKANVKKGWSDAKKSYNGTGGNNAWKRCGKSCRRWNYNRNRHGGSDNCSYSGSRWSAAGRTDNDKNYWNTRKKK : 80

spmyb84-ko line1 allele 1 : MGRACCDKANVKKGWSDTAKKSYNGTGGNNAWKRCGKSCRRWNYNRNRHGGSDNCSYSGSRWSAAGRTDNDKNYWNTRKKK : 80

spmyb84-ko line1 allele 2 : MGRACCDKANVKKGWSDAKKSYNGTGGNNAWKRCGKSCRRWNYNRNRHGGSDNCSYSGSRWSAAGRTDNDKNYWNTRKKK : 80

spmyb84-ko line2 allele 1 : MGRACCDKANVKKGWSDTAKKSYNGTGGNNAWKRCGKSCRRWNYNRNRHGGSDNCSYSGSRWSAAGRTDNDKNYWNTRKKK : 80

spmyb84-ko line2 allele 2 : MGRACCDKANVKKGWSDAKKSYNGTGGNNAWKRCGKSCRRWNYNRNRHGGSDNCSYSGSRWSAAGRTDNDKNYWNTRKKK : 80

|                            |   |                                                                                |     |   |     |   |     |   |     |       |
|----------------------------|---|--------------------------------------------------------------------------------|-----|---|-----|---|-----|---|-----|-------|
|                            |   | *                                                                              | 100 | * | 120 | * | 140 | * | 160 |       |
| Wild-type SpMYB84 allele 1 | : | GKRKHYNARRSGGNMMTMNKVSYWVSYSDARGVNDHTSRRMKGGRSASDHSNGSMVSNVMSSNMYSGSTGGYVSSSD  |     |   |     |   |     |   |     | : 160 |
| Wild-type SpMYB84 allele 2 | : | GKRKHYNARRSGGNMMTMNKVSYWVSYSDARGVNDHTSRRMKGGRSTSD--SNGSMVSNVMSSNMYSGSTGGYVSSSD |     |   |     |   |     |   |     | : 159 |
| spmyb84-ko line1 allele 1  | : | GKRKHYNARRSGGNMMTMNKVSYWVSYSDARGVNDHTSRRMKGGRSASDHSNGSMVSNVMSSNMYSGSTGGYVSSSD  |     |   |     |   |     |   |     | : 160 |
| spmyb84-ko line1 allele 2  | : | GKRKHYNARRSGGNMMTMNKVSYWVSYSDARGVNDHTSRRMKGGRSTSD--SNGSMVSNVMSSNMYSGSTGGYVSSSD |     |   |     |   |     |   |     | : 158 |
| spmyb84-ko line2 allele 1  | : | GKRKHYNARRSGGNMMTMNKVSYWVSYSDARGVNDHTSRRMKGGRSASD--HSSMVSNVMSSNMYSGSTGGYVSSSD  |     |   |     |   |     |   |     | : 158 |
| spmyb84-ko line2 allele 2  | : | GKRKHYNARRSGGNMMTMNKVSYWVSYSDARGVNDHTSRRMKGGRSTSD--SNGSMVSNVMSSNMYSGSTGGYVSSSD |     |   |     |   |     |   |     | : 159 |

  

|                            |   |                                                                                |     |   |     |   |     |   |  |       |
|----------------------------|---|--------------------------------------------------------------------------------|-----|---|-----|---|-----|---|--|-------|
|                            |   | *                                                                              | 180 | * | 200 | * | 220 | * |  |       |
| Wild-type SpMYB84 allele 1 | : | THNNTYHSSGSGMIMGSHGCGNSSSNGMVDGNSTDDYNNNNNRNVDSNMTVDMARSSSVYNHYSVHSTTTNVNKYDH* |     |   |     |   |     |   |  | : 237 |
| Wild-type SpMYB84 allele 2 | : | THNNTYHSSGSGMIMGSYGCGNSSSHGMVDGNSTDDYNN--RNVDNMTVDMARSSSVYNHYSVHSTTTNVNKYDH*   |     |   |     |   |     |   |  | : 234 |
| spmyb84-ko line1 allele 1  | : | THNNTYHDCWCYKTHSKSRCS*-----                                                    |     |   |     |   |     |   |  | : 181 |
| spmyb84-ko line1 allele 2  | : | THNNTYHDCWCYKTHSKSRCS*-----                                                    |     |   |     |   |     |   |  | : 179 |
| spmyb84-ko line2 allele 1  | : | THNNTYH-----WVRNGY-VTRT*-----                                                  |     |   |     |   |     |   |  | : 175 |
| spmyb84-ko line2 allele 2  | : | THNNTYHSSGTGMIMGSYCGNSSSHGMVDGNSTDDYNN--RNVDNMTVDMARSSSVYNHYSVHSTTTNVNKYDH*    |     |   |     |   |     |   |  | : 234 |
