# Supplementary figures and images for: Exploring Transcriptional Regulation of Hyperaccumulation in Sedum plumbizincicola through Integrated Transcriptome Analysis and CRISPR/Cas9 Technology
Source: MDPI journal article supplement (doi:10.3390/ijms241411845), 2023-07-24

# Correlation Heatmap

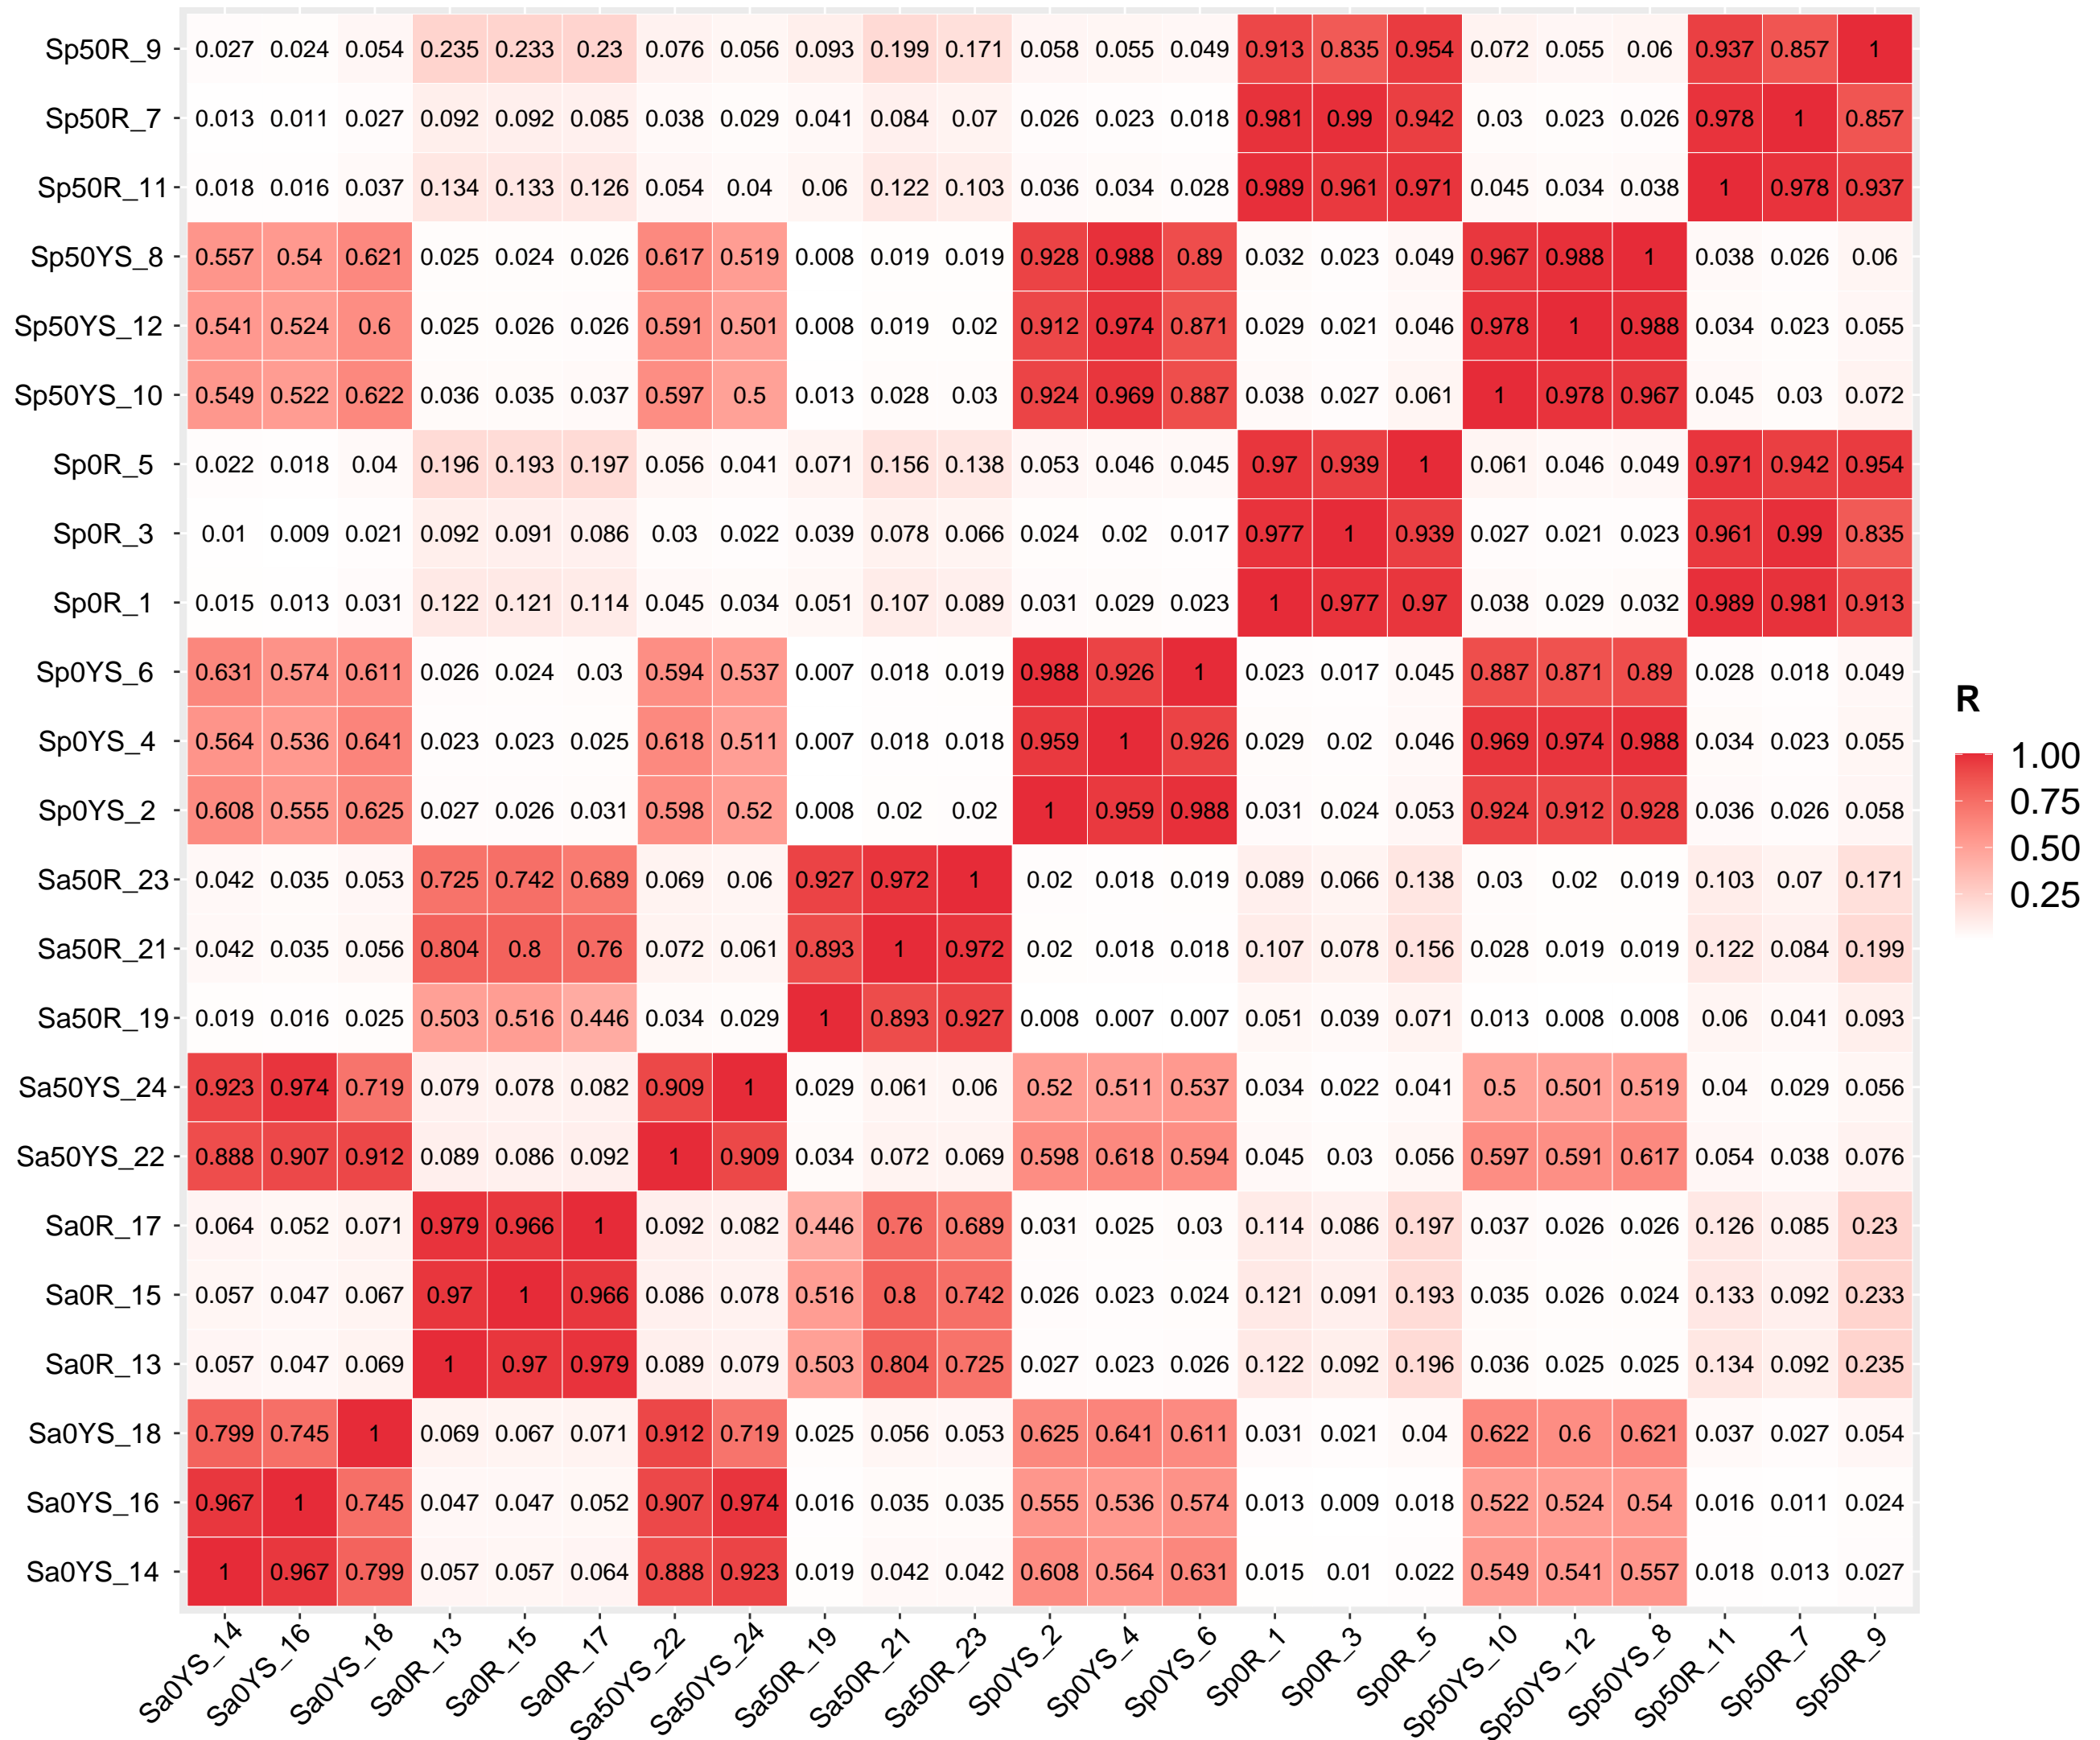

Supplement: s1 [file s1]
